# Supplementary material for: Interrogating the Role of miR-125b and Its 3′isomiRs in Protection against Hypoxia
Source: MDPI journal article supplement (doi:10.3390/ijms242116015), 2023-11-06
Supplement: s1 [file s1]

## SUPPLEMENTARY DATA

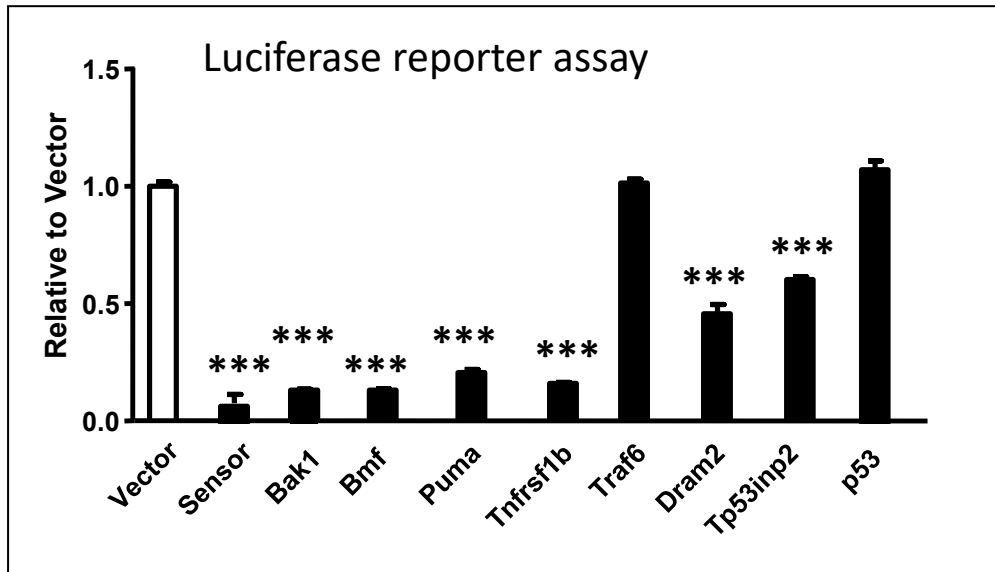

**Suppl. Figure S1:** Confirmation of miR-125b target genes by luciferase reporter assays. Target gene 3'-UTR cDNA sequences were cloned into psiCHECK™-2 dual luciferase reporter plasmid (Promega Corp., Singapore). MiR-125b sensor, the complementary binding sequence to miR-125b, was cloned as a positive control. The plasmids were co-transfected with miR-125b for 24 hr. Renilla and Firefly luciferase activities were measured using Dual-Glo® luciferase assay system (Promega Corp., Singapore). Luciferase activity for miR-125b targets were significantly decreased. Data are presented as Mean  $\pm$  SD, \*\*\* $p$  < 0.001 vs. Empty vector by two-tail unpaired t-test. N=3 in triplicates.

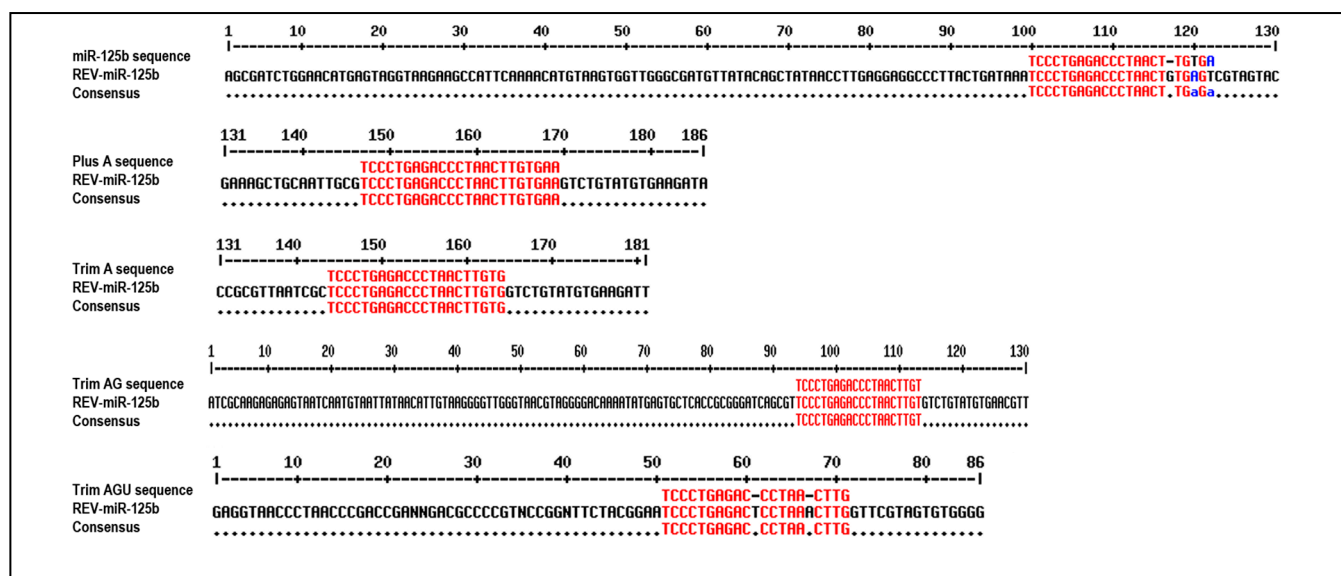

**Suppl. Figure S2:** Sanger sequencing alignment of miR-125b and isomiRs sequences.

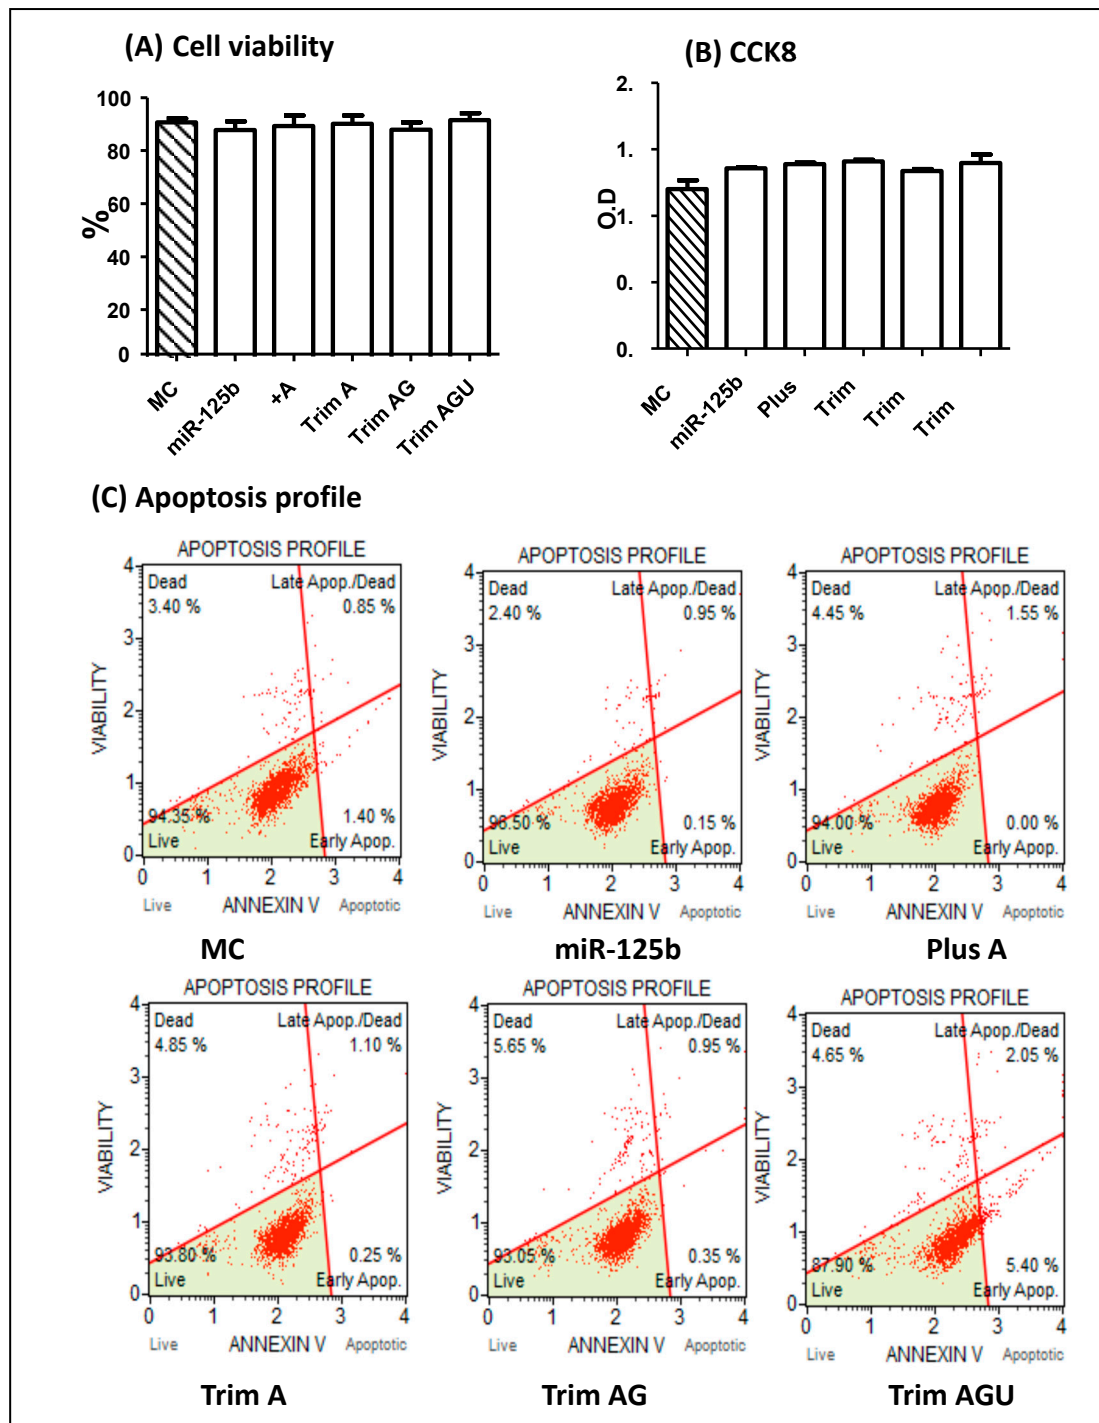

**Suppl. Figure S3:** Effects of miR-125b and its isomiRs under normoxia. miR-125b and its isomiRs mimics were transfected into H9c2. Under normoxia, miR-125b and its isomiRs did not affect the cell viability (A), CCK-8 activity (B) and apoptosis detected by Annexin V/7-AAD double staining (C). Data are presented as Mean  $\pm$  SD, significance was determined by two-tail unpaired t-test. N=3 in triplicates.

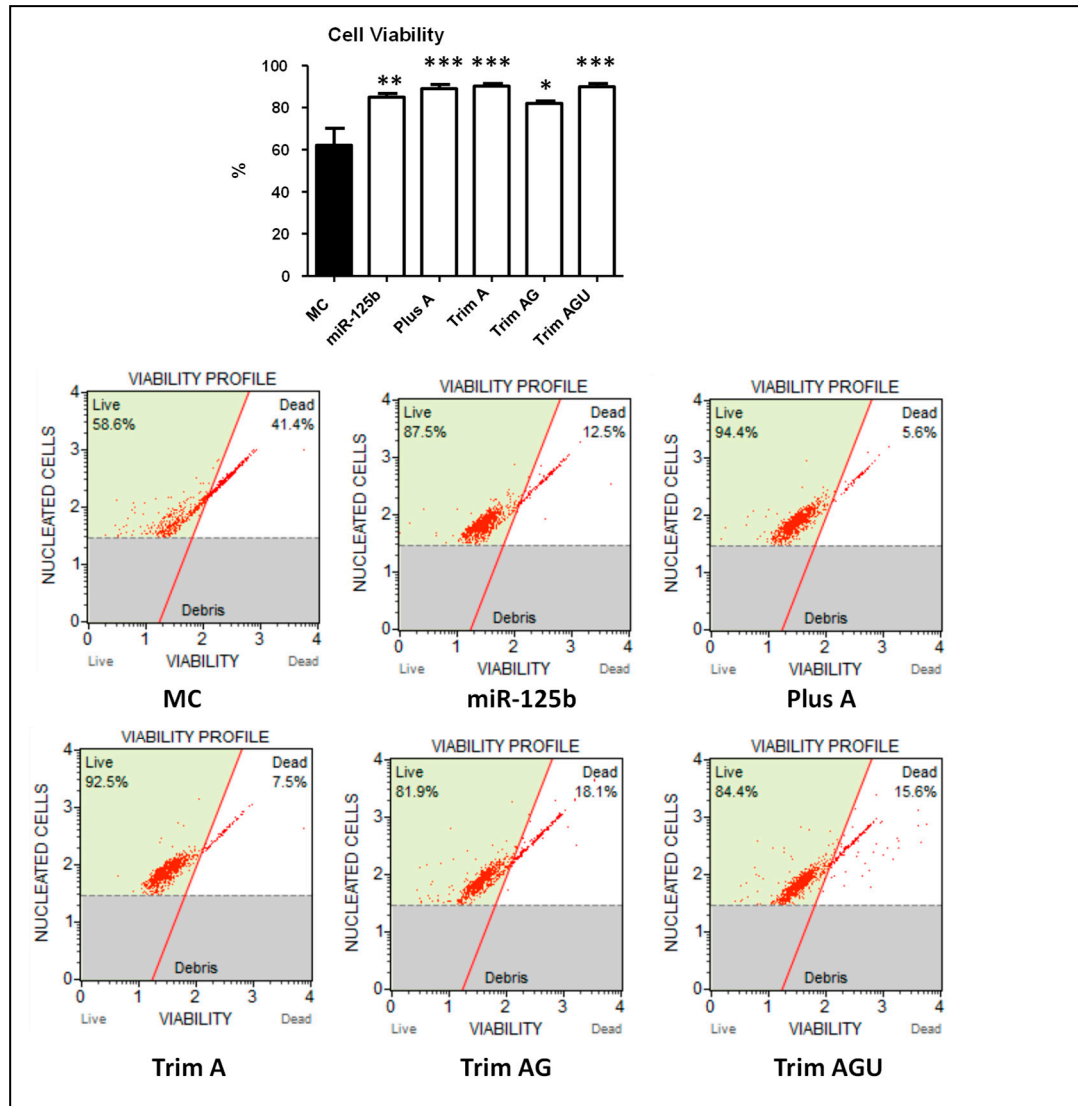

**Suppl Figure S4:** Protective effects of miR-125b and its isomiRs during hypoxia. miR-125b and its isomiRs mimics were transfected into H9c2 and subjected to hypoxia. miR-125b and its isomiRs significantly increased the cell viability as compared with MC. Data are presented as Mean  $\pm$  SD, \* $p$ <0.05, \*\* $p$ <0.01, \*\*\* $p$  < 0.001 vs. MC by two-tail unpaired t-test. N=3 in triplicates.



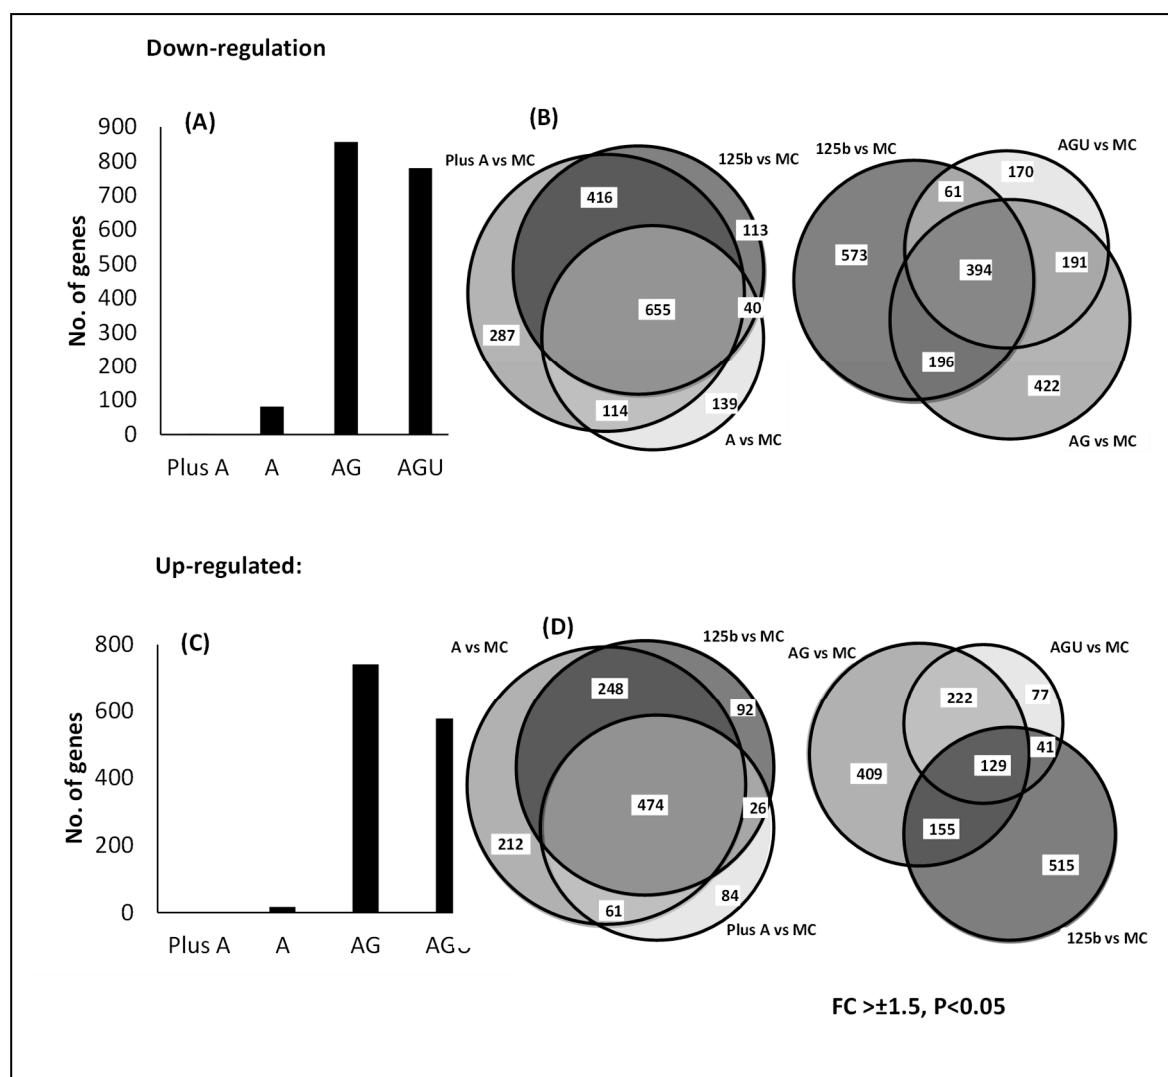

**Suppl Figure S6:** Differences of gene regulation by isomiRs in comparison between miR-125b and its isomiRs under normoxia. Genes regulated by miR-125b and isomiRs by  $\geq 1.5$ -fold change with  $p(\text{adj}) < 0.05$  compared to MC were included for further analysis. (A) and (C) show the number of up- and down-regulated genes by direct comparison between miR-125b and isomiRs. The number of overlapping genes between miR-125b and its isomiRs are presented in the proportional venn diagram (B and D).

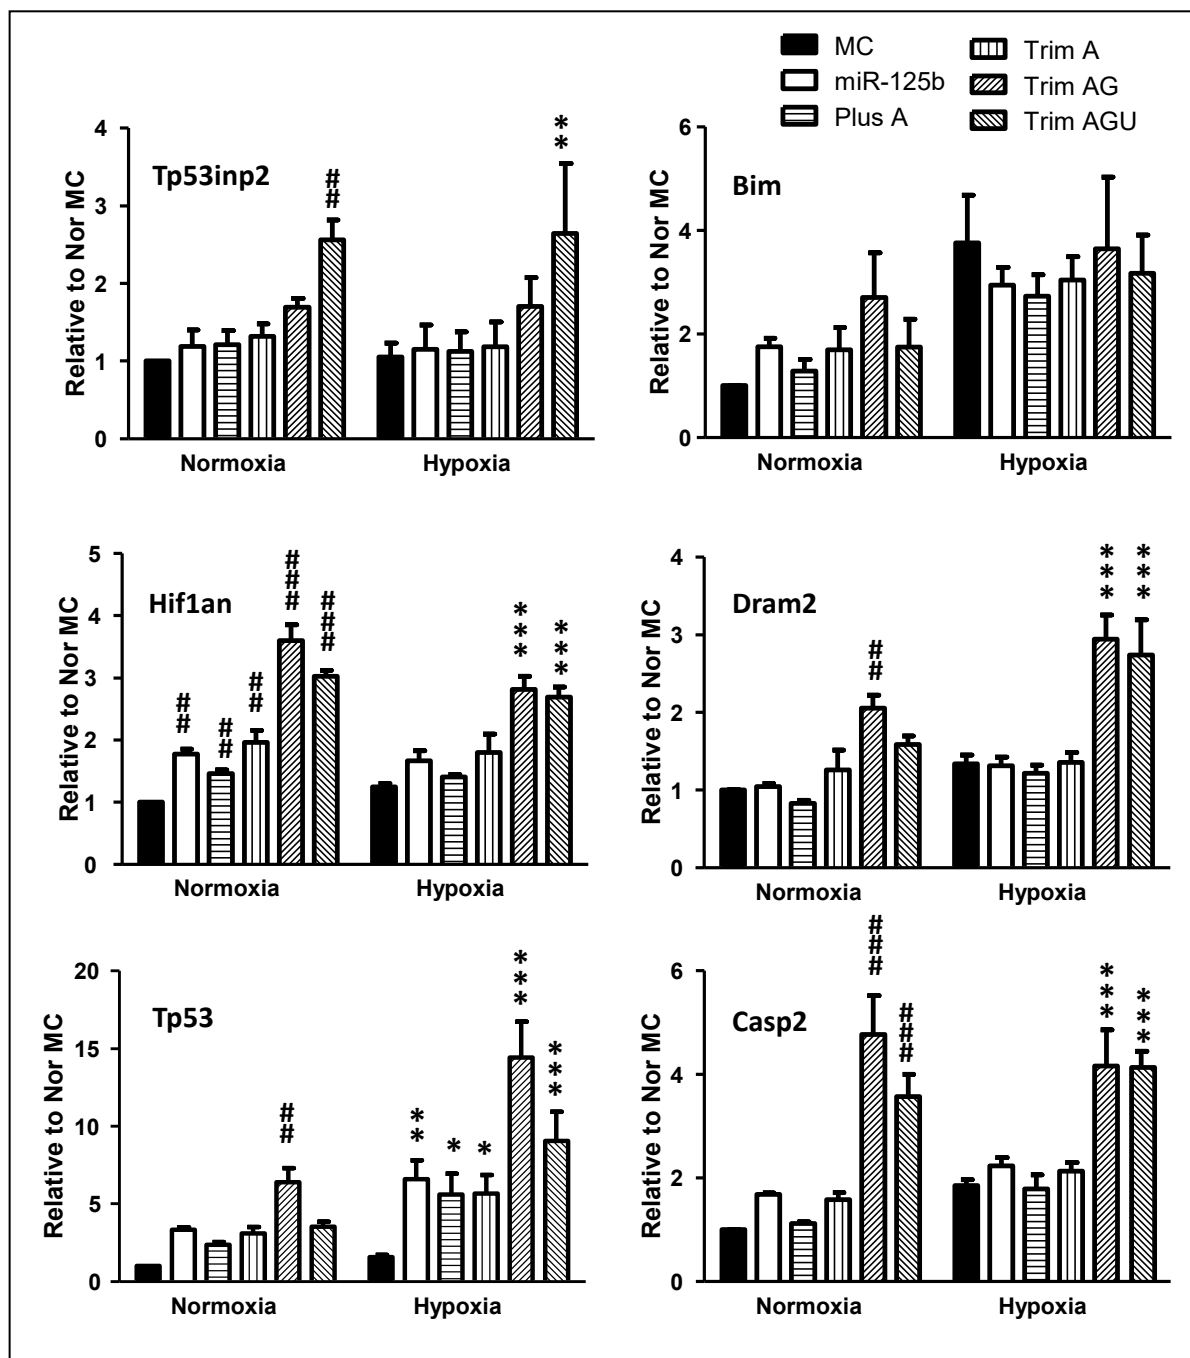

**Suppl Figure S7:** Gene regulations under normoxia and hypoxia assessed by RT-qPCR. Data are presented as Mean  $\pm$  SD with Student's t-test, \*  $p < 0.05$ , \*\*  $p < 0.01$ , \*\*\* $p < 0.001$  vs. MC by two-tail unpaired t-test. N=3 in triplicates.
